# Supplementary material for: HIF1α regulates single differentiated glioma cell dedifferentiation to stem-like cell phenotypes with high tumorigenic potential under hypoxia
Source: PubMed Central journal article supplement (PMC5438632; doi:10.18632/oncotarget.15888), 2017-03-03
Supplement: oncotarget-08-28074-s001.pdf [file oncotarget-08-28074-s001.pdf]

# HIF1 $\alpha$ regulates single differentiated glioma cell dedifferentiation to stem-like cell phenotypes with high tumorigenic potential under hypoxia

## Supplementary Materials

A

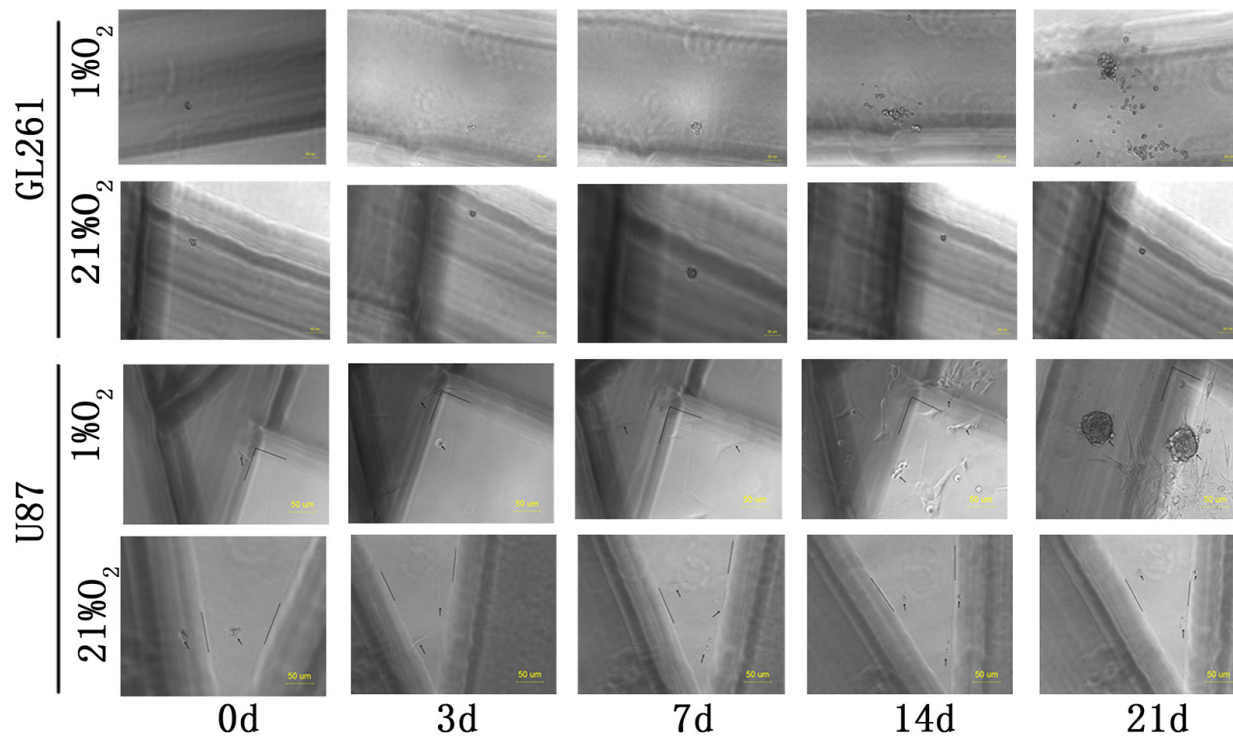

B

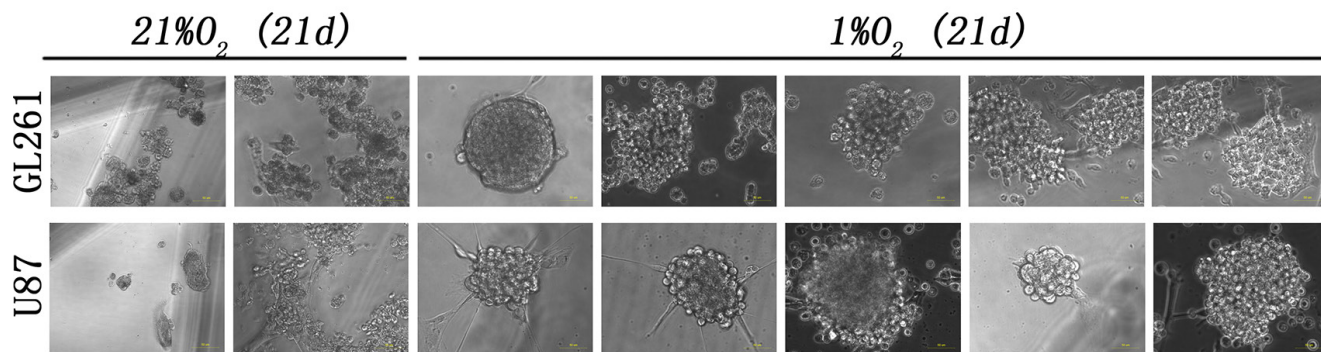

**Supplementary Figure 1: Dedifferentiation can be induced under hypoxia conditions.** (A) We recorded cell status under hypoxia and normoxia on day 0, 3, 7, 14 and 21 and found hypoxia (1%O<sub>2</sub>) induced the formation of neurospheres by Single CD133<sup>+</sup>CD15<sup>-</sup>NESTIN<sup>+</sup> GL261 or U87 cell, but no neurosphere formed under normoxia (21%O<sub>2</sub>) (B) Representative pictures of irregular, non-adherent and loose aggregates under normoxia and representative pictures of induced neurospheres under hypoxia.

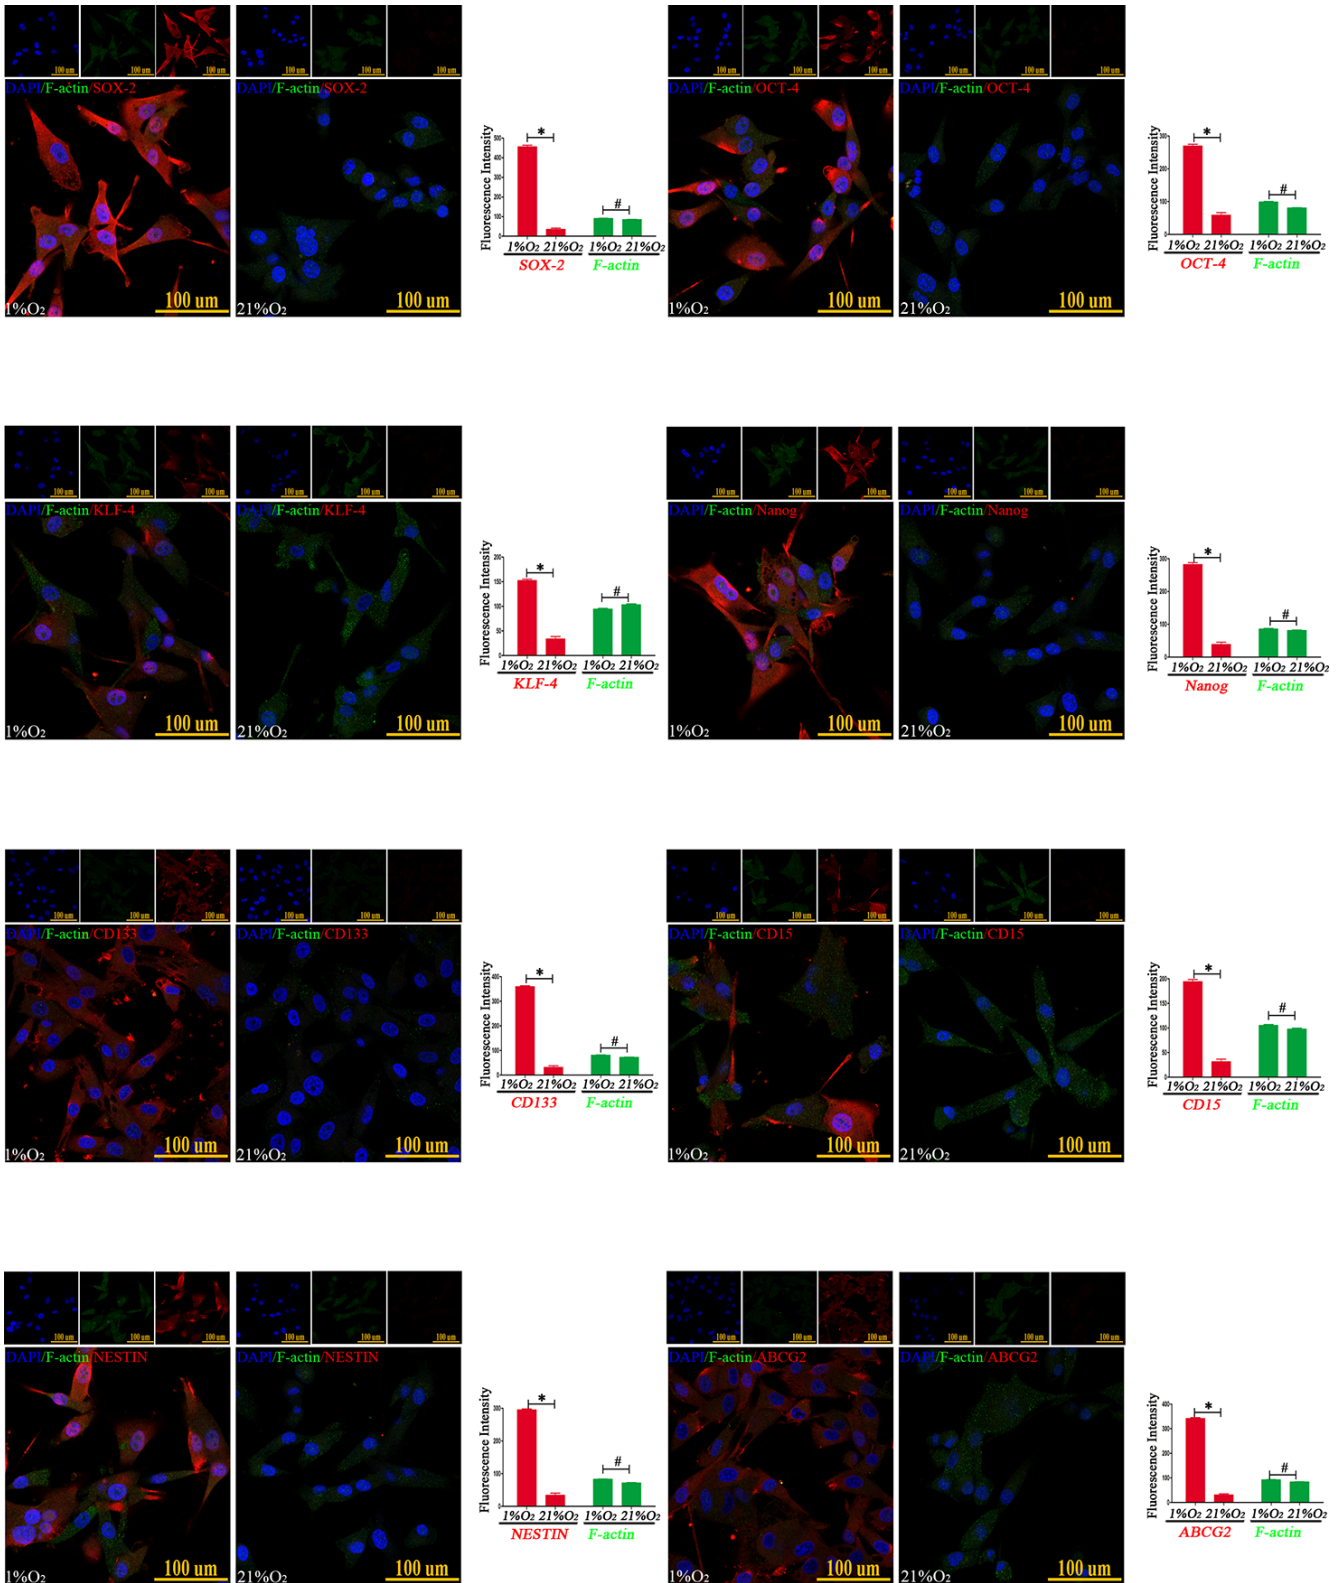

### Supplementary Figure 2: Hypoxia improved the expression of stem cell markers in the detection of immunofluorescence.

To improve the accuracy and set the detection in the same background in immunofluorescence, we did double immunofluorescent labeling of f-actin and stem cell markers for U87 CD133-CD15-NESTIN<sup>+</sup> cells cultured in hypoxia and normoxia and the results showed there were no difference for the expression of f-actin between hypoxia and normoxia group (#*P* > 0.05, Paired-samples *T* Test); however, significant higher expression were demonstrated for SOX-2, OCT-4, KLF-4, Nanog, CD133, CD15, NESTIN and ABCG2 in the cells under hypoxia compared with the expression of stem cell markers of normoxia treated cells (\**P* < 0.05, Paired-samples *T* Test).

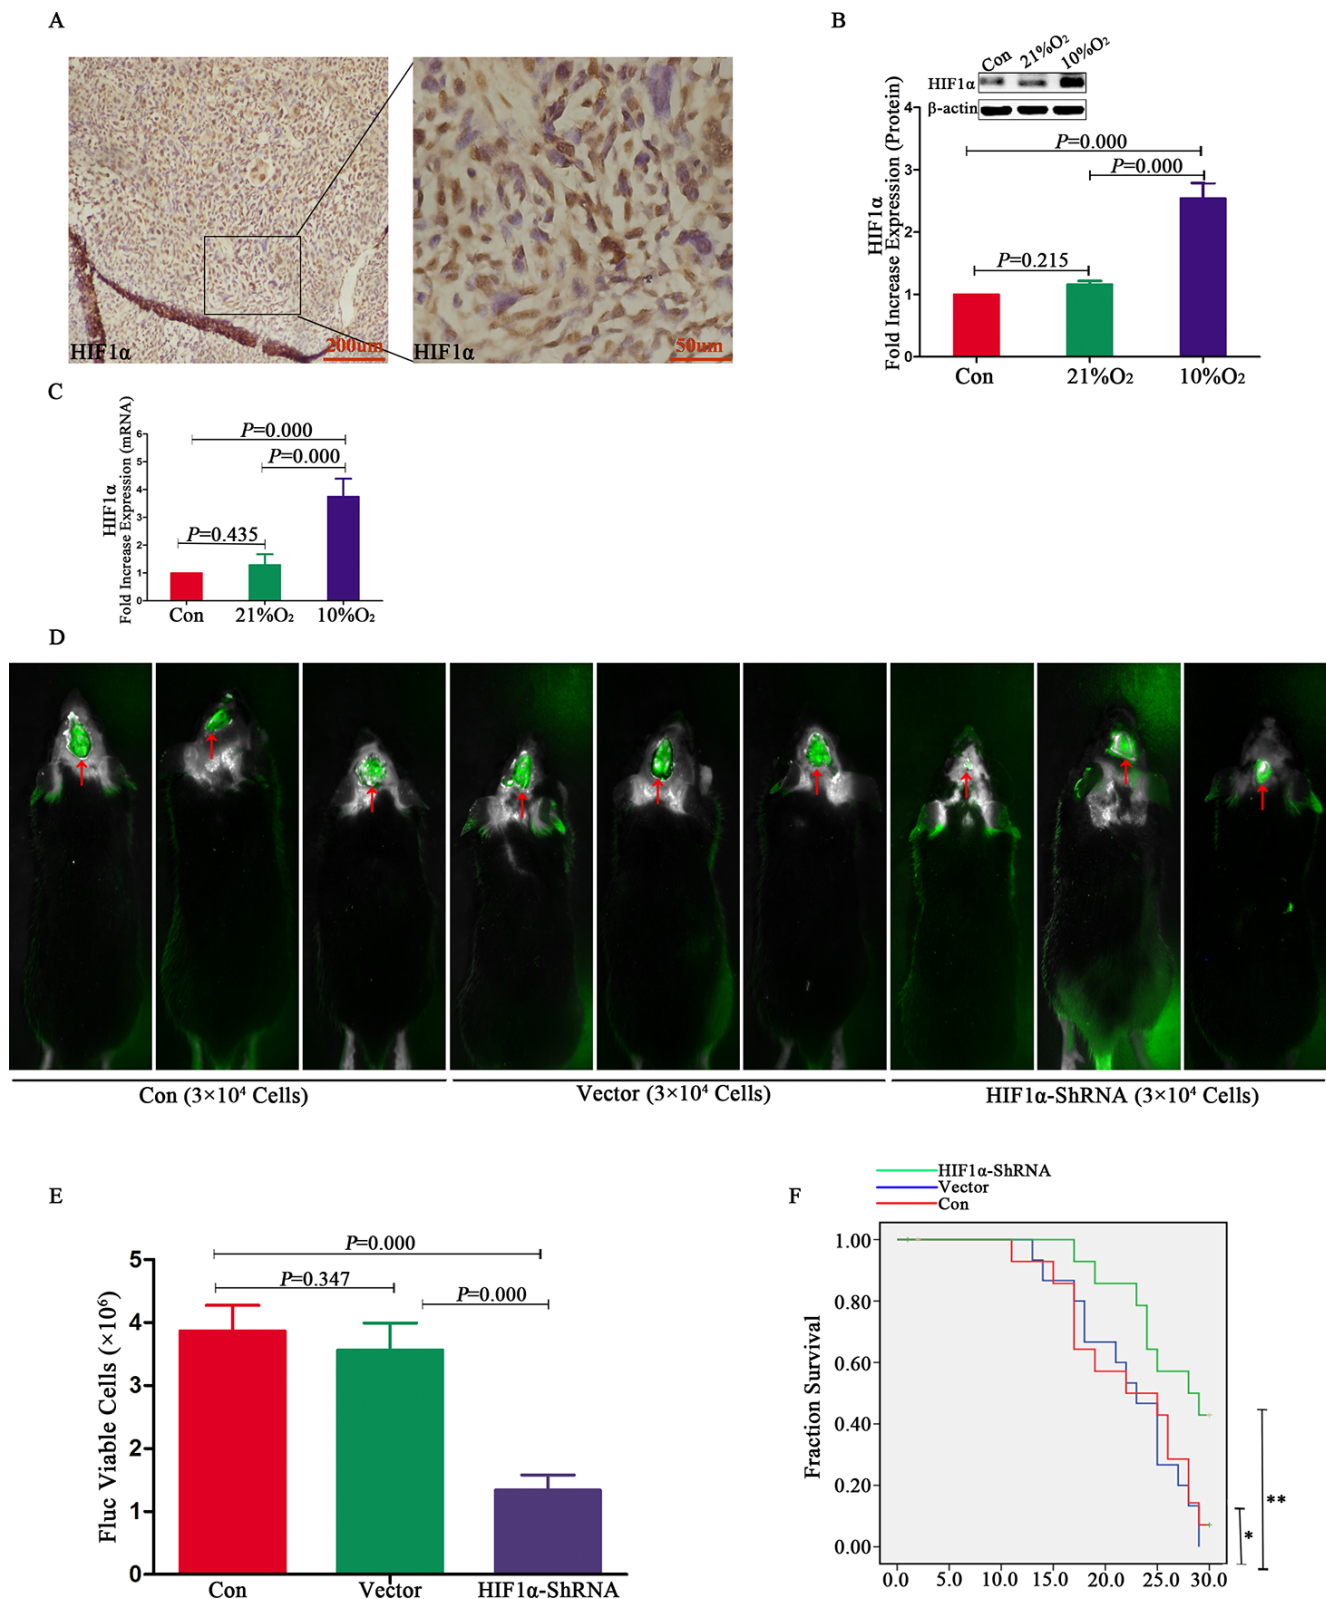

**Supplementary Figure 3: The influence of HIF1 $\alpha$  on tumor formation.** (A) Immunohistochemical staining demonstrated there was HIF1 $\alpha$  expression in tumor sample collected from mice fed in 10%O<sub>2</sub>. (B) Western-blot showed HIF1 $\alpha$  expression of tumor sample collected from mice fed in 10%O<sub>2</sub> was about three times higher than control including normal brain tissues and tumor sample obtained from normoxia (21%O<sub>2</sub>) raised mice. (C) RT-PCR showed there was higher expression of HIF1 $\alpha$  in the tumor sample collected from mice fed in 10%O<sub>2</sub>, and no differences was detected between normal brain tissues and tumor sample obtained from normoxia (21%O<sub>2</sub>) raised mice. (D–E) GL261-luc HIF1 $\alpha$ -ShRNA cells seeded group raised in 10%O<sub>2</sub> showed a smaller size of tumor formation than control and the quantitative value of bioluminescence was significantly decreased (\* $P < 0.001$ , Paired-samples  $T$  Test). (F) The survival rate of GL261 HIF1 $\alpha$ -ShRNA cells seeded group was higher than control (\* $P > 0.05$ , \*\* $P < 0.05$ , Log-rank Test)

**Supplementary Table 1: Single CD133-CD15-NESTIN- cell seeded and neurospheres formed under normoxia or hypoxia**

**A**

**Normoxia (21% O<sub>2</sub>)**

|                               | trials | 0d seeding | 3d            |            | 7d aggregates | 14d aggregates | 21d aggregates | d21 aggregates /d3 Survived |
|-------------------------------|--------|------------|---------------|------------|---------------|----------------|----------------|-----------------------------|
|                               |        |            | Survived cell | aggregates |               |                |                |                             |
| GL261<br>(3 plates/<br>trial) | 1      | 240        | 142           | 0          | 2             | 5              | 9              | 6.34                        |
|                               | 2      | 256        | 161           | 0          | 0             | 4              | 7              | 4.35                        |
|                               | 3      | 252        | 157           | 0          | 0             | 2              | 7              | 4.46                        |
|                               | mean   | 249.33     | 153.33        | 0.00       | <b>0.67</b>   | <b>3.67</b>    | <b>7.67</b>    | <b>5.05</b>                 |
|                               | SE     | 8.33       | 10.02         | 0.00       | 1.15          | 1.53           | 1.15           | 1.12                        |
| U87<br>(3 plates/<br>trial)   | 1      | 230        | 137           | 0          | 0             | 0              | 0              | 0.00                        |
|                               | 2      | 261        | 155           | 0          | 0             | 1              | 2              | 1.29                        |
|                               | 3      | 238        | 152           | 0          | 0             | 1              | 4              | 2.63                        |
|                               | mean   | 243.00     | 148           | 0.00       | <b>0.00</b>   | <b>0.67</b>    | <b>2.00</b>    | <b>1.31</b>                 |
|                               | SE     | 16.09      | 9.64          | 0.00       | 0.00          | 0.58           | 2.00           | 1.32                        |

**B**

**Hypoxia (1% O<sub>2</sub>)**

|                               | trials | 0d seeding | 3d            |         | 7d Spheres   | 14d Spheres  | 21d Spheres   | d21 Spheres /d3 Survived |
|-------------------------------|--------|------------|---------------|---------|--------------|--------------|---------------|--------------------------|
|                               |        |            | Survived cell | Spheres |              |              |               |                          |
| GL261<br>(3 plates/<br>trial) | 1      | 252        | 149           | 1       | 41           | 99           | 145           | 97.32                    |
|                               | 2      | 272        | 165           | 2       | 57           | 102          | 165           | 100.00                   |
|                               | 3      | 241        | 152           | 2       | 39           | 92           | 135           | 88.80                    |
|                               | mean   | 255.00     | 155.33        | 1.67    | <b>45.67</b> | <b>97.67</b> | <b>148.33</b> | <b>95.38</b>             |
|                               | SE     | 15.72      | 8.50          | 0.58    | 9.87         | 5.13         | 15.28         | 5.83                     |
| U87<br>(3 plates/<br>trial)   | 1      | 261        | 144           | 0       | 52           | 106          | 142           | 98.61                    |
|                               | 2      | 254        | 156           | 1       | 49           | 99           | 156           | 100.00                   |
|                               | 3      | 254        | 154           | 3       | 43           | 92           | 152           | 98.70                    |
|                               | mean   | 256.33     | 151.33        | 1.33    | <b>48.00</b> | <b>99.00</b> | <b>150.00</b> | <b>99.10</b>             |
|                               | SE     | 4.04       | 6.43          | 1.53    | 4.58         | 7.00         | 7.21          | 0.78                     |

Under hypoxia, >60% CD133-CD15-NESTIN<sup>+</sup> cells survived after exposure 3d for both GL261 and U87 glioma cells; and most surviving cells (95.38%±5.83 from GL261 and 99.10%±0.78 from U87) formed neurospheres at 21 d. However, under normoxia, only 5.05%±1.12 from GL261 and 1.31%±1.32 from U87 cells formed sparse, irregular and non-adherent aggregates.

**Supplementary Table 2: Numerical value of the Fluc-Viable glioma cells in groups**

| Tumor<br>Group | Time (d)<br>Size | Time (d)            |                      |                      |                       |                       |
|----------------|------------------|---------------------|----------------------|----------------------|-----------------------|-----------------------|
|                |                  | 5d                  | 10d                  | 15d                  | 20d                   | 25d                   |
| 1              |                  | $8.280 \times 10^4$ | $31.840 \times 10^4$ | $4.211 \times 10^4$  | $523.100 \times 10^4$ | $399.000 \times 10^4$ |
|                |                  | $2.819 \times 10^4$ | $8.718 \times 10^4$  | $6.185 \times 10^4$  | $294.200 \times 10^4$ | $334.200 \times 10^4$ |
|                |                  | $2.101 \times 10^4$ | $2.209 \times 10^4$  | $29.810 \times 10^4$ | $156.100 \times 10^4$ | $62.770 \times 10^4$  |
| 2              |                  | $1.814 \times 10^4$ | $3.272 \times 10^4$  | $0.775 \times 10^4$  | $2.940 \times 10^4$   | $1.086 \times 10^4$   |
|                |                  | $1.636 \times 10^4$ | $2.761 \times 10^4$  | $3.756 \times 10^4$  | $1.957 \times 10^4$   | $0.976 \times 10^4$   |
|                |                  | $1.613 \times 10^4$ | $4.046 \times 10^4$  | $4.593 \times 10^4$  | $2.844 \times 10^4$   | $1.246 \times 10^4$   |
| 3              |                  | $2.624 \times 10^4$ | $8.684 \times 10^4$  | $47.140 \times 10^4$ | $87.690 \times 10^4$  | $0.416 \times 10^4$   |
|                |                  | $2.678 \times 10^4$ | $14.990 \times 10^4$ | $1.466 \times 10^4$  | $12.810 \times 10^4$  | $0.551 \times 10^4$   |
|                |                  | $4.271 \times 10^4$ | $14.230 \times 10^4$ | $31.600 \times 10^4$ | $3.273 \times 10^4$   | $2.795 \times 10^4$   |
| 4              |                  | $3.946 \times 10^4$ | $19.680 \times 10^4$ | $99.870 \times 10^4$ | $126.000 \times 10^4$ | $545.500 \times 10^4$ |
|                |                  | $4.757 \times 10^4$ | $20.880 \times 10^4$ | $30.450 \times 10^4$ | $19.990 \times 10^4$  | $258.100 \times 10^4$ |
|                |                  | $6.010 \times 10^4$ | $25.540 \times 10^4$ | $90.930 \times 10^4$ | $536.500 \times 10^4$ | $11.390 \times 10^4$  |

Group 1: C57 Mouse (21%O<sub>2</sub>); GL261 Cell (1%O<sub>2</sub>)  
 Group 2: C57 Mouse (21%O<sub>2</sub>); GL261 Cell (21%O<sub>2</sub>) } STRATEGY 1

Group 3: C57 Mouse (21%O<sub>2</sub>); GL261 Cell (21%O<sub>2</sub>)  
 Group 4: C57 Mouse (10%O<sub>2</sub>); GL261 Cell (21%O<sub>2</sub>) } STRATEGY 2

Two different strategies were used to investigate the effect of hypoxia-induced GSCs on tumorigenesis in vivo. STRATEGY 1 (Group1-Group2): 14d hypoxia (1%)-induced neurospheres-derived GL261 cells (Group1 10<sup>4</sup>) or normoxia (21%)-derived GL261 CD133-CD15-NESTIN<sup>+</sup> cells (Group2 10<sup>4</sup>) were injected into the brains of adult female C57 mice and these mice were raised under normoxia (21% O<sub>2</sub>). There were no significant differences on tumor volume between the two groups on day 5; but after 25d, tumors were detected in group 1 with magnitude orders more than 10<sup>6</sup>. For group 2 the orders of magnitude were around 10<sup>4</sup>. STRATEGY 2 (Group3-Group4): the mice in group 3 (3 × 10<sup>4</sup>) underwent similar changes as group 2 in strategy 1, and group 4 was injected with differentiated CD133-CD15-NESTIN<sup>+</sup> GL261 cells (3 × 10<sup>4</sup>) but raised under 10% O<sub>2</sub> at 25 d, tumors were detected in group 4 with magnitude orders greater than 10<sup>6</sup>. For group 3 the orders of magnitude were less than 10<sup>4</sup> and only reached to 4,161.

**Supplementary Table 3: Single CD133<sup>+</sup>CD15<sup>-</sup>NESTIN<sup>-</sup> cell seeded and neurospheres formed under hypoxia contained FBS or not**

**A**

**1%O<sub>2</sub>(No FBS)**

|       | trials | 0d seeding | Survived cell | 3d aggregates | 7d aggregates | 14d aggregates | 21d aggregates | d21 aggregates /d3 Survived |
|-------|--------|------------|---------------|---------------|---------------|----------------|----------------|-----------------------------|
| GL261 | 1      | 263        | 102           | 0             | 1             | 4              | 9              | 8.82                        |
|       | 2      | 251        | 95            | 0             | 0             | 2              | 5              | 5.26                        |
|       | 3      | 257        | 92            | 0             | 0             | 0              | 1              | 1.09                        |
|       | mean   | 257        | 96.00         | 0             | <b>0.33</b>   | <b>2.00</b>    | <b>5.00</b>    | <b>5.06</b>                 |
|       | SE     | 6          | 5.13          | 0             | 0.58          | 2              | 4              | 3.87                        |
| U87   | 1      | 272        | 113           | 1             | 1             | 4              | 7              | 6.19                        |
|       | 2      | 251        | 105           | 0             | 2             | 3              | 5              | 4.76                        |
|       | 3      | 263        | 103           | 0             | 0             | 3              | 5              | 4.85                        |
|       | mean   | 262.00     | 107           | 0.33          | <b>1.00</b>   | <b>3.33</b>    | <b>5.67</b>    | <b>5.27</b>                 |
|       | SE     | 10.54      | 5.29          | 0.58          | 1.00          | 0.58           | 1.15           | 0.80                        |

**B**

**1%O<sub>2</sub>( Contained FBS)**

|       | trials | 0d seeding | Survived cell | 3d Spheres | 7d Spheres   | 14d Spheres  | 21d Spheres   | d21 Spheres /d3 Survived |
|-------|--------|------------|---------------|------------|--------------|--------------|---------------|--------------------------|
| GL261 | 1      | 252        | 149           | 1          | 41           | 99           | 145           | 97.32                    |
|       | 2      | 272        | 165           | 2          | 57           | 102          | 165           | 100.00                   |
|       | 3      | 241        | 152           | 2          | 39           | 92           | 135           | 88.80                    |
|       | mean   | 255.00     | 155.33        | 1.67       | <b>45.67</b> | <b>97.67</b> | <b>148.33</b> | <b>95.38</b>             |
|       | SE     | 15.72      | 8.50          | 0.58       | 9.87         | 5.13         | 15.28         | 5.83                     |
| U87   | 1      | 261        | 144           | 0          | 52           | 106          | 142           | 98.61                    |
|       | 2      | 254        | 156           | 1          | 49           | 99           | 156           | 100.00                   |
|       | 3      | 254        | 154           | 3          | 43           | 92           | 152           | 98.70                    |
|       | mean   | 256.33     | 151.33        | 1.33       | <b>48.00</b> | <b>99.00</b> | <b>150.00</b> | <b>99.10</b>             |
|       | SE     | 4.04       | 6.43          | 1.53       | 4.58         | 7.00         | 7.21          | 0.78                     |

The clone formation rates (spheres/d3 viable cells) were 5.06% ± 3.87 from GL261 and 5.27% ± 0.80 from U87 cells suspended in medium without FBS following hypoxia treatment 21d. However, the clone formation rates (spheres/d3 viable cells) of GL261 and U87 suspended with DMEM/F12+10% FBS were more than 95% after hypoxia treatment 21 d.

**Supplementary Table 4: Single U87 CD133-CD15-NESTIN-HIF1 $\alpha$ -ShRNA cell seeded and spheres formed under hypoxia**

| Hypoxia (1%O <sub>2</sub> ) |        |            |               |         |              |              |               |              |                          |
|-----------------------------|--------|------------|---------------|---------|--------------|--------------|---------------|--------------|--------------------------|
| I                           | trials | 0d seeding | 3d            |         |              | 7d Spheres   | 14d Spheres   | 21d Spheres  | d21 Spheres /d3 Survived |
|                             |        |            | Survived cell | Spheres |              |              |               |              |                          |
| I                           | 1      | 243        | 134           | 6       | 52           | 92           | 132           | 98.51        |                          |
|                             | 2      | 234        | 144           | 5       | 61           | 97           | 144           | 100.00       |                          |
|                             | 3      | 219        | 133           | 9       | 49           | 85           | 129           | 96.99        |                          |
|                             | mean   | 232.00     | 137.00        | 6.67    | <b>54.00</b> | <b>91.33</b> | <b>135</b>    | <b>98.5</b>  |                          |
|                             | SE     | 12.12      | 6.08          | 2.08    | 6.24         | 6.03         | 7.94          | 1.51         |                          |
| II                          | 1      | 257        | 155           | 9       | 61           | 104          | 148           | 95.48        |                          |
|                             | 2      | 229        | 127           | 6       | 55           | 89           | 125           | 98.43        |                          |
|                             | 3      | 237        | 139           | 11      | 45           | 82           | 137           | 98.56        |                          |
|                             | mean   | 241.00     | 140.00        | 8.67    | <b>53.67</b> | <b>91.67</b> | <b>136.67</b> | <b>97.49</b> |                          |
|                             | SE     | 14.42      | 14.05         | 2.52    | 8.08         | 11.24        | 11.50         | 1.74         |                          |

|     | trials | 0d seeding | 3d            |         |              | 7d Spheres   | 14d Spheres  | 21d Spheres  | d21 Spheres /d3 Survived |
|-----|--------|------------|---------------|---------|--------------|--------------|--------------|--------------|--------------------------|
|     |        |            | Survived cell | Spheres |              |              |              |              |                          |
| III | 1      | 253        | 141           | 1       | 23           | 53           | 86           | 60.99        |                          |
|     | 2      | 247        | 136           | 3       | 19           | 58           | 92           | 67.65        |                          |
|     | 3      | 257        | 129           | 7       | 12           | 61           | 80           | 62.02        |                          |
|     | mean   | 252.00     | 135.00        | 3.67    | <b>18.00</b> | <b>57.33</b> | <b>86.00</b> | <b>63.55</b> |                          |
|     | SE     | 5.03       | 6.03          | 3.06    | 5.57         | 4.04         | 6.00         | 3.59         |                          |
| IV  | 1      | 272        | 137           | 0       | 0            | 1            | 2            | 1.46         |                          |
|     | 2      | 261        | 119           | 0       | 1            | 1            | 2            | 1.68         |                          |
|     | 3      | 243        | 112           | 0       | 2            | 2            | 3            | 2.68         |                          |
|     | mean   | 259.00     | 123.00        | 0.00    | <b>1.00</b>  | <b>1.33</b>  | <b>2.33</b>  | <b>1.94</b>  |                          |
|     | SE     | 14.64      | 12.90         | 0.00    | 1.00         | 0.58         | 0.58         | 0.65         |                          |

I: U87 Not-Targeted HIF1 $\alpha$  (1%O<sub>2</sub>);

II: U87 HIF1 $\alpha$ -Vector 3(1%O<sub>2</sub>);

III: U87 HIF1 $\alpha$ -ShRNA 3(1%O<sub>2</sub>);

IV: Digoxin (1%O<sub>2</sub>)

The neurosphere formation rate of the HIF1 $\alpha$ -ShRNA- or digoxin-treated U87 cells was substantially lower than that of the controls. The numerical value was  $63.55 \pm 3.59\%$  from the single CD133-CD15-NESTIN-HIF1 $\alpha$ -ShRNA U87 cells and  $1.94 \pm 0.65\%$  from digoxin treatment U87 cells.

**Supplementary Table 5: the primer sequences of stem cell markers**

|                     | upstream (5'→3')         | downstream (5'→3')          |
|---------------------|--------------------------|-----------------------------|
| Human SOX-2         | GGAGGGGTGCAAAAGAGGAGAG   | TCCCCAAAAAGAAGTCCAGG        |
| Human OCT-4         | CCCGCCGTATGAGTTCTGTGG    | CCGGGTTTTGCTCCAGCTTCTC      |
| Human KLF-4         | GGCTGCGGCAAAACCTACAC     | CGGGCGAATTTCCATCCAC         |
| Human Nanog         | CCGCGCCCTGCCTAGAAAAGAC   | AGCCTCCCAATCCCAAACAATACG    |
| Human CD133         | GCCCCAGGAAATTTGAGGAAC    | GCTTTGGTATAGAGTGCTCAGTGATTG |
| Human CD15          | TGGGCAGGCTGGTCTTGAAC     | CACGGCGGCTCACACCTGTA        |
| Human NESTIN        | GCCCCTGGTGGAAGATGATG     | GCCCTGAACCTCTTTGCCTC        |
| Human ABCG2         | TAGTGAGGAAAGTTCTCTGTC    | AGCTCAGTTAACTCCTGTAAG       |
| Human HIF1 $\alpha$ | CCCTCACCCACAAAATTAC      | GGGACTATTAGGCTCAGGTGAAC     |
| Human VEGF          | TTCGGGAACCAGATCTCTCACC   | CGGACCCAAAGTGCTCTGC         |
| Mouse SOX-2         | GGGGCAGCGGCGTAAGATG      | CCCGCTCGCCATGCTGTTC         |
| Mouse OCT-4         | GCCCGGAAGAGAAAGCGAAC     | GGGGCAGAGGAAAGGATACAG       |
| Mouse KLF-4         | CCGGCCCAACACACAGACTTC    | GAACCCGGTGGCATGAGCTCTTG     |
| Mouse Nanog         | GCCAGCTGTGTGCACTCAAGG    | GGCTTCCAGATGCGTTCACCAGATA   |
| Mouse CD133         | CCGCGATGGACTCTGCTGTTAATG | GGGCACAGTCTCAACATCGTCGTATAC |
| Mouse CD15          | ATCGGGCTGCTGCACACTG      | AGCGGAAGTAGCGGCGATAGAC      |
| Mouse NESTIN        | GCCCAAGCAGGTGAACAAGACT   | CAGCCCTTGCATTCCAGAGTCT      |
| Mouse ABCG2         | AGAAACTCTTCATACATGAGTACA | AAGTGTGCTACAGACACCACAC      |
| Mouse HIF1 $\alpha$ | AGCCTTAACCTGTCTGCCACTTTG | GGGCACAGTCTCAACATCGTCGTATAC |
| Mouse VEGF          | CCGGTTTAAATCCTGGAGCGTTC  | CACCGCCTTGGCTTGTCACA        |
| $\beta$ -actin      | ACCGGCCGCCAGCTCACC       | GGGGGGCACGAAGGCTCATC        |
